# Supplementary material for: Association of Funisitis with Short-Term Outcomes of Prematurity: A Frequentist and Bayesian Meta-Analysis
Source: MDPI journal article supplement (doi:10.3390/antiox12020534), 2023-02-20
Supplement: s1 [file s1]

## Supplementary Online Content

### Association of funisitis with short-term outcomes of prematurity: A frequentist and Bayesian meta-analysis.

Tamara M Hundscheid, Maurice J Huizing, Eduardo Villamor-Martinez, František Bartoš, Eduardo Villamor.

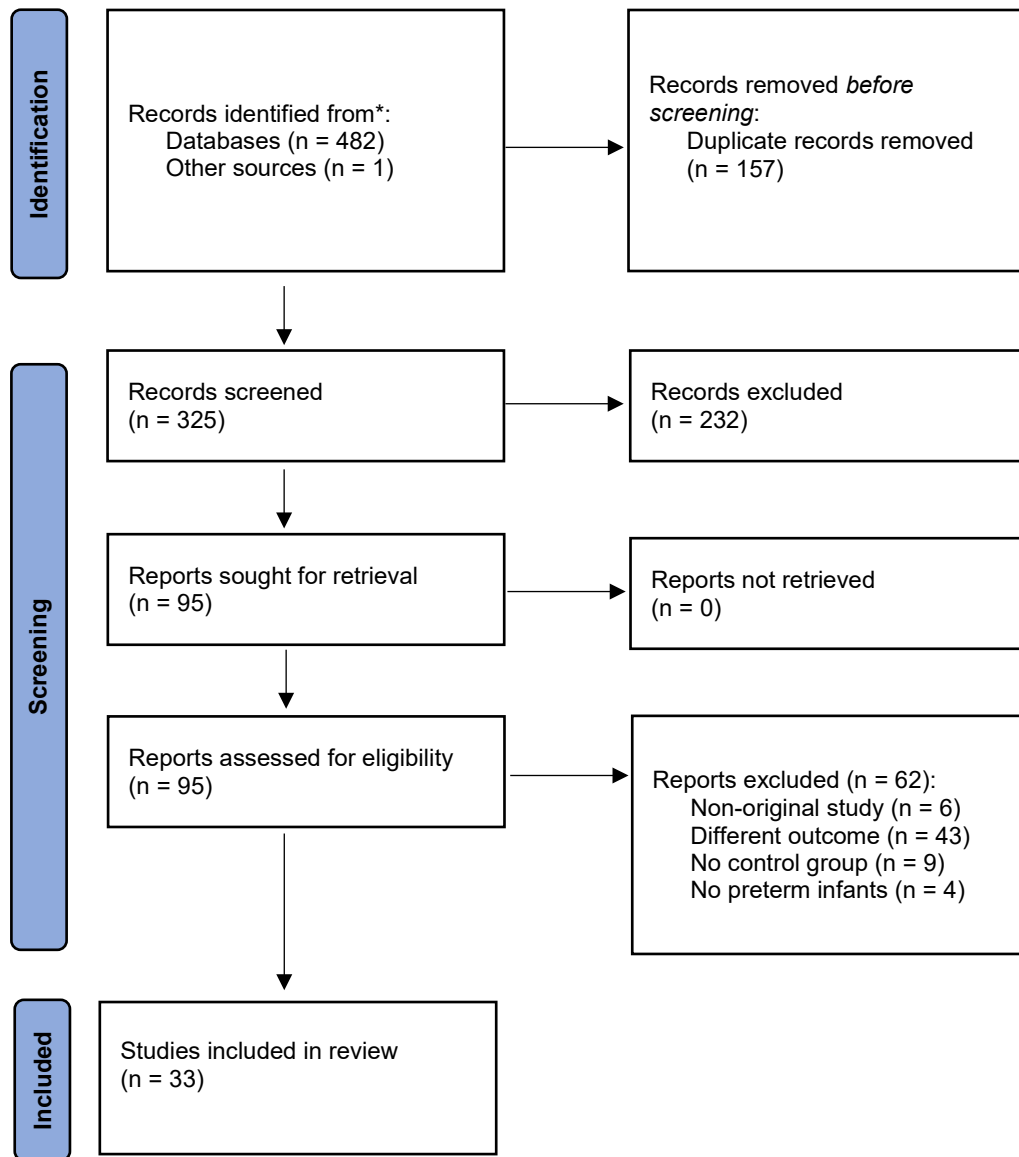

Figure S1. PRISMA Diagram

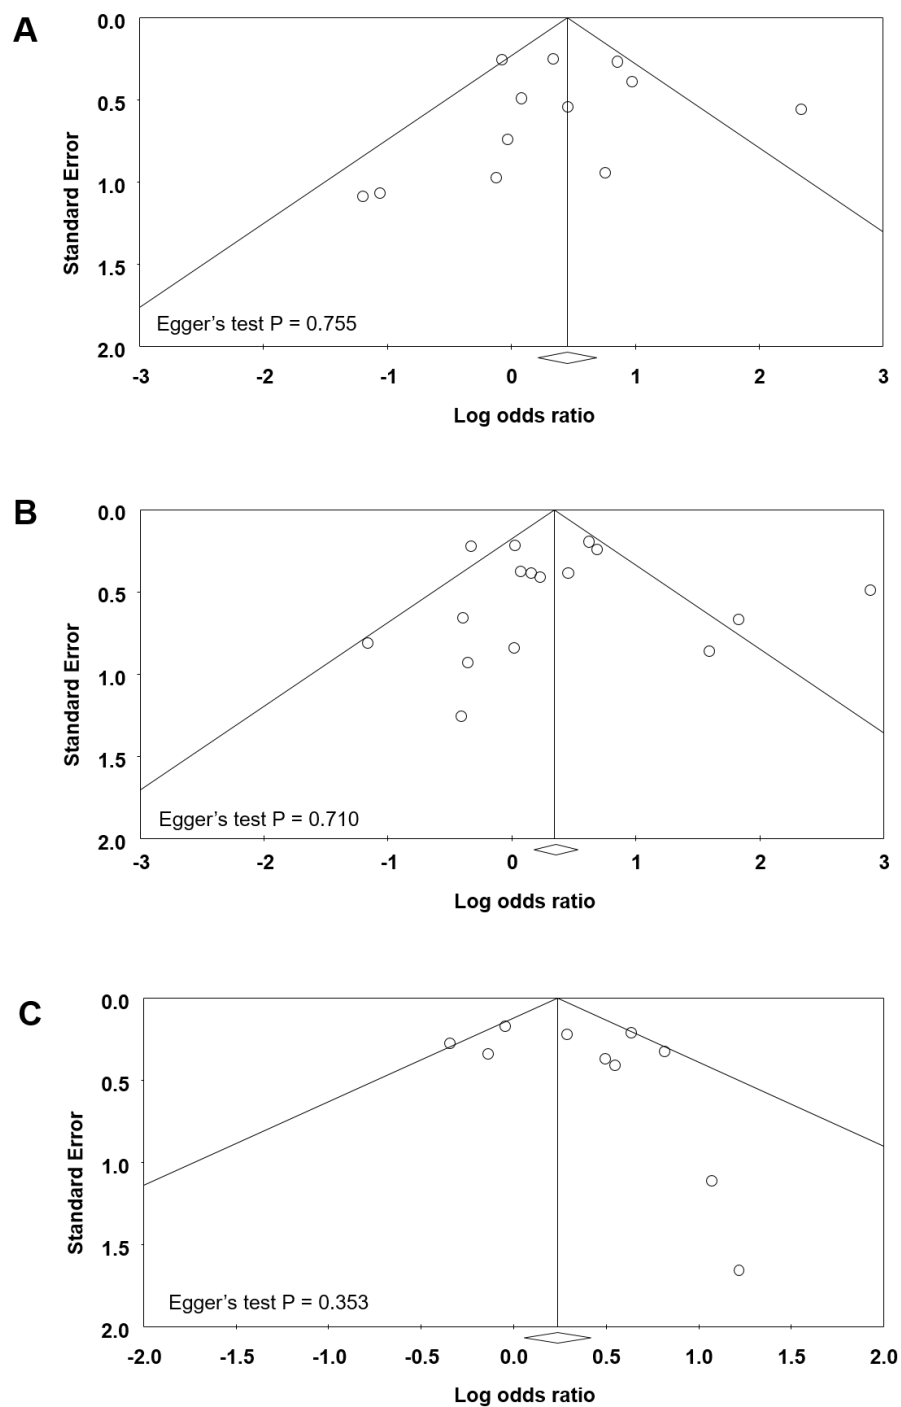

**Figure S2. Publication bias: Funnel plots of exposure to funisitis compared to preterm infants without exposure to funisitis and short-term neonatal complications.**

A. Funnel plot for the association with mortality (K=12)

B. Funnel plot for the association with moderate/severe bronchopulmonary dysplasia (K=16)

C. Funnel plot for the association with any sepsis (K=10)

**Table S1. Characteristics of the included studies and risk of bias assessment.**

| First author, year       | Country     | Design | Prospective? | Total infants | Centers | Mean GA (weeks) | Outcomes                                   | Selection | Comparability | Exposure/ Outcome | Total NOS |
|--------------------------|-------------|--------|--------------|---------------|---------|-----------------|--------------------------------------------|-----------|---------------|-------------------|-----------|
| Andersen, 2003 [1]       | Canada      | Cohort | No           | 22            | 1       | 27.65           | BPD                                        | 4         | 0             | 3                 | 7         |
| Babnik, 2006 [2]         | Slovenia    | Cohort | Yes          | 142           | 1       | 27.40           | IVH                                        | 4         | 0             | 3                 | 7         |
| Been, 2009 [3]           | Netherlands | Cohort | Yes          | 301           | 1       | 29.08           | Mortality, BPD, PDA, PVL, NEC, IVH, sepsis | 4         | 1             | 3                 | 8         |
| Dessardo, 2012 [4]       | Croatia     | Cohort | Yes          | 189           | 1       | 29.96           | BPD, PDA, sepsis                           | 4         | 0             | 3                 | 7         |
| Fujimura, 1989 [5]       | Japan       | Cohort | Yes          | 753           | 1       | 30.77           | BPD                                        | 4         | 0             | 3                 | 7         |
| Graham, 2004 [6]         | USA         | Ca-co  | No           | 300           | 1       | 27.45           | PVL                                        | 4         | 0             | 3                 | 7         |
| Hong, 2021 [7]           | South Korea | Cohort | No           | 474           | 1       | 32.25           | Mortality, BPD, NEC, IVH, sepsis           | 4         | 2             | 3                 | 9         |
| Ikeda, 2015 [8]          | Japan       | Cohort | No           | 294           | 1       | 27.21           | BPD                                        | 4         | 1             | 3                 | 8         |
| Jackson, 2017 [9]        | USA         | Cohort | No           | 35            | 3       | 26.48           | BPD                                        | 4         | 0             | 3                 | 7         |
| Kelly, 2022 [10]         | USA         | Ca-co  | No           | 152           | NA      | NA              | BPD                                        | 4         | 0             | 2                 | 6         |
| Kent, 2004 [11]          | Australia   | Cohort | Yes          | 241           | 1       | 27.69           | BPD                                        | 4         | 0             | 3                 | 7         |
| Kent, 2005 [12]          | Australia   | Cohort | Yes          | 212           | 1       | 27.69           | Mortality, IVH                             | 4         | 0             | 3                 | 7         |
| Lahra, 2009 [13]         | Australia   | Cohort | Yes          | 761           | 1       | 27.40           | PDA, sepsis                                | 4         | 1             | 3                 | 8         |
| Lau, 2005 [14]           | Canada      | Cohort | No           | 1296          | 2       | 33.23           | Mortality, BPD, NEC, IVH, ROP, PDA, sepsis | 4         | 1             | 3                 | 8         |
| Lee, 2017 [15]           | South Korea | Cohort | No           | 354           | 1       | 29.00           | NEC                                        | 4         | 2             | 3                 | 9         |
| Lee, 2015 [16]           | South Korea | Cohort | No           | 339           | 1       | 30.04           | Mortality, BPD, IVH, PVL, ROP, NEC         | 4         | 1             | 3                 | 8         |
| Liu, 2014 [17]           | China       | Cohort | Yes          | 216           | 1       | 31.69           | BPD, PDA, NEC, ROP, Mortality              | 4         | 1             | 3                 | 8         |
| Lynch, 2018 [18]         | USA         | Cohort | No           | 1217          | 1       | 29.00           | ROP                                        | 4         | 2             | 3                 | 9         |
| Pavcnik-Arnol, 2014 [19] | Slovenia    | Cohort | Yes          | 40            | 1       | 28.73           | Mortality, BPD, IVH, PVL, sepsis           | 4         | 0             | 3                 | 7         |
| Perniciaro, 2020 [20]    | Italy       | Cohort | No           | 162           | 1       | 28.81           | BPD, PDA                                   | 4         | 0             | 3                 | 7         |
| Plakkal, 2013 [21]       | Canada      | Cohort | No           | 529           | 1       | 26.04           | Mortality, BPD, PDA, NEC, sepsis           | 4         | 2             | 3                 | 9         |
| Puri, 2016 [22]          | USA         | Cohort | No           | 106           | 2       | 27.13           | Mortality, NEC, sepsis                     | 4         | 1             | 3                 | 8         |

|                        |             |        |     |      |    |       |                                       |   |   |   |   |
|------------------------|-------------|--------|-----|------|----|-------|---------------------------------------|---|---|---|---|
| Richardson, 2006 [23]  | Canada      | Cohort | No  | 660  | 1  | 30.09 | Mortality, BPD, IVH, PVL              | 4 | 0 | 2 | 6 |
| Rocha, 2007 [24]       | Portugal    | Cohort | No  | 452  | 3  | 29.36 | IVH, PVL                              | 4 | 2 | 3 | 9 |
| Salas, 2013 [25]       | USA         | Cohort | No  | 347  | 1  | 25.68 | Mortality, IVH, PVL, sepsis           | 4 | 0 | 3 | 7 |
| Smit, 2015 [26]        | Netherlands | Cohort | Yes | 300  | 2  | 29.37 | BPD, PDA, PVL, NEC, IVH, sepsis       | 4 | 1 | 3 | 8 |
| Thomas, 2010 [27]      | Poland      | Cohort | Yes | 42   | 1  | 27.35 | Mortality, BPD                        | 4 | 1 | 3 | 8 |
| Thorell, 2020 [28]     | Sweden      | Cohort | No  | 50   | 1  | 29.86 | BPD, PDA, PVL, NEC, IVH, sepsis       | 4 | 2 | 3 | 9 |
| Torchin, 2017 [29]     | France      | Cohort | Yes | 1683 | 25 | NA    | Mortality, BPD                        | 4 | 2 | 3 | 9 |
| Trevisanuto, 2013 [30] | Italy       | Ca-co  | Yes | 142  | 1  | 27.78 | Mortality, BPD, NEC, IVH, PVL, sepsis | 4 | 1 | 3 | 8 |
| Wharton, 2004 [31]     | USA         | Ca-co  | No  | 68   | 1  | 27.25 | PVL                                   | 4 | 1 | 3 | 8 |
| Woo, 2012 [32]         | South Korea | Cohort | No  | 246  | 1  | 29.14 | ROP                                   | 4 | 2 | 3 | 9 |
| Yamada, 2015 [33]      | Japan       | Cohort | No  | 112  | 1  | NA    | Mortality, BPD, IVH, NEC              | 4 | 0 | 3 | 7 |

BPD: bronchopulmonary dysplasia, GA: gestational age, IVH: intraventricular hemorrhage, NA: not applicable, NEC: necrotizing enterocolitis, PDA: patent ductus arteriosus, PVL: periventricular leukomalacia, ROP: retinopathy of prematurity, USA: United States of America.

**Table S2. Meta-analysis on association between funisitis and short-term outcomes of prematurity in infants with gestational age up to 32 weeks.**

| Outcome   |                                  | K  | OR    | 95% CI      |             | P     | Heterogeneity      |        |
|-----------|----------------------------------|----|-------|-------------|-------------|-------|--------------------|--------|
|           |                                  |    |       | Lower limit | Upper limit |       | I <sup>2</sup> (%) | P      |
| Mortality |                                  | 8  | 1.307 | 0.948       | 1.803       | 0.102 | 9.1                | 0.360  |
| BPD       | Any BPD                          | 4  | 1.669 | 1.138       | 2.449       | 0.009 | 0.0                | 0.688  |
|           | Moderate/severe BPD              | 13 | 1.466 | 0.921       | 2.335       | 0.107 | 76.0               | <0.001 |
|           | Severe BPD                       | 3  | 1.590 | 0.571       | 4.428       | 0.375 | 81.3               | 0.005  |
|           | BPD or death                     | 3  | 1.348 | 1.035       | 1.756       | 0.027 | 0.0                | 0.403  |
| ROP       | Any ROP                          | 3  | 1.591 | 1.047       | 2.418       | 0.030 | 39.6               | 0.191  |
|           | Severe ROP                       | 2  | 1.107 | 0.277       | 4.435       | 0.885 | 69.1               | 0.072  |
| PDA       | Any PDA                          | 2  | 2.458 | 0.440       | 13.715      | 0.305 | 90.7               | 0.001  |
|           | PDA requiring any treatment      | 3  | 1.316 | 0.567       | 3.058       | 0.523 | 79.2               | 0.008  |
|           | PDA requiring surgical treatment | 3  | 2.963 | 0.695       | 12.630      | 0.142 | 76.7               | 0.014  |
| PVL       | Any PVL                          | 4  | 2.589 | 1.281       | 5.233       | 0.008 | 0.0                | 0.643  |
|           | Cystic PVL                       | 2  | 0.948 | 0.363       | 2.475       | 0.914 | 0.0                | 0.983  |
| IVH       | Any IVH                          | 3  | 2.350 | 1.390       | 3.972       | 0.001 | 31.8               | 0.231  |
|           | Severe IVH                       | 6  | 1.585 | 0.926       | 2.711       | 0.093 | 19.4               | 0.287  |
| NEC       | Any NEC                          | 1  | 3.424 | 0.660       | 17.770      | 0.143 | 0.0                | 1.000  |
|           | Severe NEC                       | 6  | 1.014 | 0.477       | 2.155       | 0.972 | 57.3               | 0.038  |
|           | NEC or death                     | 2  | 0.610 | 0.255       | 1.460       | 0.267 | 24.0               | 0.251  |
| Sepsis    | Any sepsis                       | 6  | 1.080 | 0.838       | 1.391       | 0.552 | 24.5               | 0.251  |
|           | Early-onset sepsis               | 4  | 1.802 | 0.756       | 4.296       | 0.184 | 54.5               | 0.086  |
|           | Late-onset sepsis                | 4  | 1.089 | 0.775       | 1.532       | 0.623 | 0.0                | 0.396  |

BPD: bronchopulmonary dysplasia, IVH: intraventricular hemorrhage, NEC: necrotizing enterocolitis, PDA: patent ductus arteriosus, PVL: periventricular leukomalacia, ROP: retinopathy of prematurity.

**Table S3. Data on heterogeneity of the Bayesian model-average (BMA) meta-analysis of the association between funisitis and outcomes of prematurity.**

| Outcome                    | Comparison      | K  | Heterogeneity (Tau) | Standard Error | Credible interval |             | BF <sub>rf</sub> | Evidence for   |               | Frequentist p-value for heterogeneity |
|----------------------------|-----------------|----|---------------------|----------------|-------------------|-------------|------------------|----------------|---------------|---------------------------------------|
|                            |                 |    |                     |                | Lower Limit       | Upper Limit |                  | Random effects | Fixed effects |                                       |
| Mortality                  | Fun+ vs Fun-    | 12 | 0.524               | 0.224          | 0.191             | 1.044       | 10.65            | strong         |               | 0.007                                 |
|                            | Fun+ vs Fun-CA- | 12 | 0.546               | 0.255          | 0.183             | 1.158       | 6.169            | moderate       |               | 0.004                                 |
|                            | Fun+ vs Fun-CA+ | 12 | 0.468               | 0.234          | 0.147             | 1.040       | 0.972            |                | weak          | 0.072                                 |
| Any BPD                    | Fun+ vs Fun-    | 6  | 0.320               | 0.167          | 0.116             | 0.735       | 0.569            |                | weak          | 0.683                                 |
|                            | Fun+ vs Fun-CA- | 7  | 0.358               | 0.184          | 0.128             | 0.821       | 0.706            |                | weak          | 0.303                                 |
|                            | Fun+ vs Fun-CA+ | 7  | 0.348               | 0.178          | 0.125             | 0.792       | 0.458            |                | weak          | 0.627                                 |
| Moderate/severe BPD        | Fun+ vs Fun-    | 16 | 0.723               | 0.217          | 0.368             | 1.204       | 11651            | strong         |               | <0.001                                |
|                            | Fun+ vs Fun-CA- | 14 | 0.759               | 0.230          | 0.392             | 1.294       | 42766            | strong         |               | <0.001                                |
|                            | Fun+ vs Fun-CA+ | 14 | 0.531               | 0.253          | 0.158             | 1.112       | 2.078            | weak           |               | 0.006                                 |
| Severe BPD                 | Fun+ vs Fun-    | 3  | 0.677               | 0.414          | 0.204             | 1.736       | 4.333            | moderate       |               | 0.005                                 |
|                            | Fun+ vs Fun-CA- | 3  | 0.789               | 0.455          | 0.242             | 1.952       | 8.420            | moderate       |               | 0.002                                 |
|                            | Fun+ vs Fun-CA+ | 3  | 0.447               | 0.299          | 0.131             | 1.267       | 0.530            |                | weak          | 0.497                                 |
| BPD or death               | Fun+ vs Fun-    | 3  | 0.445               | 0.309          | 0.130             | 1.274       | 1.293            | weak           |               | 0.403                                 |
|                            | Fun+ vs Fun-CA- | 3  | 0.468               | 0.298          | 0.136             | 1.296       | 1.847            | weak           |               | 0.275                                 |
|                            | Fun+ vs Fun-CA+ | 3  | 0.425               | 0.299          | 0.126             | 1.211       | 0.307            |                | moderate      | 0.949                                 |
| Any ROP                    | Fun+ vs Fun-    | 3  | 0.440               | 0.275          | 0.134             | 1.170       | 1.660            | weak           |               | 0.191                                 |
|                            | Fun+ vs Fun-CA- | 4  | 0.384               | 0.231          | 0.129             | 0.978       | 0.938            |                | weak          | 0.343                                 |
|                            | Fun+ vs Fun-CA+ | 3  | 0.415               | 0.270          | 0.126             | 1.157       | 0.644            |                | weak          | 0.541                                 |
| Severe ROP                 | Fun+ vs Fun-    | 3  | 0.563               | 0.392          | 0.141             | 1.603       | 1.674            | weak           |               | 0.106                                 |
|                            | Fun+ vs Fun-CA- | 3  | 0.638               | 0.451          | 0.147             | 1.822       | 2.479            | weak           |               | 0.049                                 |
|                            | Fun+ vs Fun-CA+ | 3  | 0.452               | 0.318          | 0.129             | 1.252       | 0.544            |                | weak          | 0.597                                 |
| Any PDA                    | Fun+ vs Fun-    | 3  | 0.844               | 0.518          | 0.227             | 2.202       | 15.09            | strong         |               | 0.003                                 |
|                            | Fun+ vs Fun-CA- | 3  | 0.780               | 0.497          | 0.202             | 2.047       | 8.112            | moderate       |               | 0.007                                 |
|                            | Fun+ vs Fun-CA+ | 3  | 0.770               | 0.526          | 0.188             | 2.019       | 2.668            | weak           |               | 0.014                                 |
| PDA req treatment          | Fun+ vs Fun-    | 5  | 0.650               | 0.316          | 0.268             | 1.476       | 4551             | strong         |               | <0.001                                |
|                            | Fun+ vs Fun-CA- | 4  | 0.665               | 0.309          | 0.282             | 1.479       | 9344             | strong         |               | <0.001                                |
|                            | Fun+ vs Fun-CA+ | 4  | 0.429               | 0.247          | 0.142             | 1.051       | 0.784            |                | weak          | 0.148                                 |
| PDA req surgical treatment | Fun+ vs Fun-    | 3  | 0.843               | 0.604          | 0.172             | 2.447       | 3.299            | moderate       |               | 0.014                                 |
|                            | Fun+ vs Fun-CA- | 3  | 0.761               | 0.590          | 0.167             | 2.272       | 1.986            | weak           |               | 0.041                                 |
|                            | Fun+ vs Fun-CA+ | 3  | 0.651               | 0.556          | 0.141             | 2.124       | 0.862            |                | weak          | 0.091                                 |
| Any PVL                    | Fun+ vs Fun-    | 5  | 0.464               | 0.309          | 0.129             | 1.278       | 0.727            |                | weak          | 0.400                                 |
|                            | Fun+ vs Fun-CA- | 4  | 0.485               | 0.325          | 0.134             | 1.353       | 0.662            |                | weak          | 0.165                                 |
|                            | Fun+ vs Fun-CA+ | 3  | 0.514               | 0.399          | 0.133             | 1.518       | 0.708            |                | weak          | 0.998                                 |

| Outcome           | Comparison      | K  | Heterogeneity (Tau) | Standard Error | Credible interval |             | BF <sub>rf</sub> | Evidence for   |               | Frequentist p-value for heterogeneity |
|-------------------|-----------------|----|---------------------|----------------|-------------------|-------------|------------------|----------------|---------------|---------------------------------------|
|                   |                 |    |                     |                | Lower Limit       | Upper Limit |                  | Random effects | Fixed effects |                                       |
| Cystic PVL        | Fun+ vs Fun-    | 5  | 0.351               | 0.193          | 0.119             | 0.848       | 0.303            |                | moderate      | 0.996                                 |
|                   | Fun+ vs Fun-CA- | 4  | 0.350               | 0.189          | 0.120             | 0.836       | 0.325            |                | moderate      | 0.745                                 |
|                   | Fun+ vs Fun-CA+ | 3  | 0.471               | 0.315          | 0.134             | 1.334       | 0.591            |                | weak          | 0.382                                 |
| Any IVH           | Fun+ vs Fun-    | 6  | 0.352               | 0.186          | 0.122             | 0.813       | 0.493            |                | weak          | 0.487                                 |
|                   | Fun+ vs Fun-CA- | 6  | 0.341               | 0.174          | 0.121             | 0.779       | 0.419            |                | weak          | 0.627                                 |
|                   | Fun+ vs Fun-CA+ | 7  | 0.377               | 0.197          | 0.129             | 0.875       | 0.662            |                | weak          | 0.451                                 |
| Severe IVH        | Fun+ vs Fun-    | 9  | 0.367               | 0.195          | 0.124             | 0.853       | 0.632            |                | weak          | 0.425                                 |
|                   | Fun+ vs Fun-CA- | 9  | 0.382               | 0.196          | 0.127             | 0.867       | 0.758            |                | weak          | 0.285                                 |
|                   | Fun+ vs Fun-CA+ | 9  | 0.358               | 0.191          | 0.121             | 0.841       | 0.362            |                | weak          | 0.695                                 |
| Any NEC           | Fun+ vs Fun-    | 2  | 0.654               | 0.552          | 0.143             | 2.160       | 0.929            |                | weak          | 0.174                                 |
|                   | Fun+ vs Fun-CA- | 2  | 0.658               | 0.544          | 0.142             | 2.203       | 0.946            |                | weak          | 0.155                                 |
|                   | Fun+ vs Fun-CA+ | 3  | 0.533               | 0.402          | 0.131             | 1.616       | 0.728            |                | weak          | 0.699                                 |
| NEC stage 2 or up | Fun+ vs Fun-    | 8  | 0.623               | 0.276          | 0.231             | 1.283       | 10.85            | strong         |               | 0.009                                 |
|                   | Fun+ vs Fun-CA- | 9  | 0.782               | 0.309          | 0.307             | 1.505       | 33.68            | strong         |               | 0.001                                 |
|                   | Fun+ vs Fun-CA+ | 8  | 0.372               | 0.192          | 0.126             | 0.854       | 0.533            |                | weak          | 0.704                                 |
| NEC or death      | Fun+ vs Fun-    | 2  | 0.555               | 0.437          | 0.139             | 1.727       | 0.996            |                | weak          | 0.251                                 |
|                   | Fun+ vs Fun-CA- | 2  | 0.629               | 0.504          | 0.150             | 1.946       | 1.193            | weak           |               | 0.124                                 |
|                   | Fun+ vs Fun-CA+ | 2  | 0.527               | 0.412          | 0.133             | 1.648       | 0.897            |                | weak          | 0.617                                 |
| Any sepsis        | Fun+ vs Fun-    | 10 | 0.349               | 0.139          | 0.150             | 0.682       | 3.790            | moderate       |               | 0.053                                 |
|                   | Fun+ vs Fun-CA- | 10 | 0.331               | 0.130          | 0.139             | 0.630       | 2.773            | weak           |               | 0.077                                 |
|                   | Fun+ vs Fun-CA+ | 10 | 0.514               | 0.234          | 0.175             | 1.061       | 3.090            | moderate       |               | 0.010                                 |
| EOS               | Fun+ vs Fun-    | 6  | 0.559               | 0.290          | 0.177             | 1.271       | 4.281            | moderate       |               | 0.017                                 |
|                   | Fun+ vs Fun-CA- | 4  | 0.533               | 0.314          | 0.158             | 1.331       | 2.249            | weak           |               | 0.053                                 |
|                   | Fun+ vs Fun-CA+ | 4  | 0.572               | 0.375          | 0.157             | 1.541       | 1.102            | weak           |               | 0.081                                 |
| LOS               | Fun+ vs Fun-    | 6  | 0.330               | 0.165          | 0.120             | 0.760       | 0.466            |                | weak          | 0.431                                 |
|                   | Fun+ vs Fun-CA- | 5  | 0.411               | 0.236          | 0.132             | 1.052       | 0.837            |                | weak          | 0.195                                 |
|                   | Fun+ vs Fun-CA+ | 5  | 0.386               | 0.253          | 0.125             | 0.944       | 0.401            |                | weak          | 0.591                                 |

BF<sub>rf</sub>: Bayes factor random/fixed (ratio of the probability of the data under the random effects model over the probability of the data under the fixed effect model), BPD: bronchopulmonary dysplasia, CA: chorioamnionitis, EOS: early-onset sepsis, FUN: funisitis, IVH: intraventricular hemorrhage, LOS: late-onset sepsis, NEC: necrotizing enterocolitis, PDA: patent ductus arteriosus, PVL: periventricular leukomalacia, ROP: retinopathy of prematurity.

**Table S4. Meta-analysis on association between stages of funisitis and short-term outcomes of prematurity.**

| Outcome    | Comparison           | K | OR    | 95% CI      |             | P-value | BMA analysis<br>BF <sub>10</sub> |
|------------|----------------------|---|-------|-------------|-------------|---------|----------------------------------|
|            |                      |   |       | Lower limit | Upper Limit |         |                                  |
| Mortality  | Stage 3 vs Stage 1+2 | 3 | 1.471 | 0.692       | 3.128       | 0.316   | 0.565                            |
|            | Stage 2+3 vs Stage 1 | 2 | 0.646 | 0.243       | 1.719       | 0.382   | 0.611                            |
|            | Stage 3 vs Stage 1   | 2 | 1.236 | 0.293       | 5.214       | 0.773   | 0.532                            |
| Any BPD    | Stage 3 vs Stage 1+2 | 2 | 1.660 | 0.789       | 3.491       | 0.182   | 0.739                            |
|            | Stage 2+3 vs Stage 1 | 2 | 1.637 | 0.924       | 2.903       | 0.091   | 0.935                            |
|            | Stage 3 vs Stage 1   | 2 | 1.947 | 0.837       | 4.529       | 0.122   | 0.817                            |
| Severe IVH | Stage 3 vs Stage 1+2 | 3 | 0.760 | 0.318       | 1.817       | 0.538   | 0.499                            |
|            | Stage 2+3 vs Stage 1 | 2 | 0.698 | 0.204       | 2.397       | 0.568   | 0.514                            |
|            | Stage 3 vs Stage 1   | 2 | 0.724 | 0.188       | 2.783       | 0.638   | 0.533                            |

BF<sub>10</sub>: ratio of the probability of the data under the alternative hypothesis (H<sub>1</sub>) over the probability of the data under the null hypothesis (H<sub>0</sub>), BMA: Bayesian model-average, BPD: bronchopulmonary dysplasia, IVH: intraventricular hemorrhage.

**Table S5. Meta-analysis on association between funisitis and levels of interleukin-6 in umbilical cord blood.**

| Comparison      | K | Hedges' g | 95% CI      |             | P-value | BMA analysis<br>BF <sub>10</sub> |
|-----------------|---|-----------|-------------|-------------|---------|----------------------------------|
|                 |   |           | Lower limit | Upper limit |         |                                  |
| Fun+ vs Fun-    | 3 | 1.065     | 0.505       | 1.625       | <0.001  | 29.29                            |
| Fun+ vs Fun-CA- | 2 | 0.982     | 0.540       | 1.423       | <0.001  | 15.20                            |
| Fun+ vs Fun-CA+ | 2 | 0.688     | 0.164       | 1.212       | 0.010   | 2.896                            |

BMA: Bayesian model-average, BF<sub>10</sub>: ratio of the probability of the data under the alternative hypothesis (H<sub>1</sub>) over the probability of the data under the null hypothesis (H<sub>0</sub>), CA: chorioamnionitis, Fun: funisitis, NA: not applicable.



**Table S6. Meta-regression of the correlation between different covariates and the odds ratio of the association of funisitis with outcome of prematurity.**

| Covariate                          | Outcome             | K  | Coefficient | 95% CI      |             | P     | R <sup>2</sup> -analog |
|------------------------------------|---------------------|----|-------------|-------------|-------------|-------|------------------------|
|                                    |                     |    |             | Lower limit | Upper limit |       |                        |
| MD in GA (funisitis minus control) | Mortality           | 12 | 0.034       | -0.157      | 0.225       | 0.727 | 0.0                    |
|                                    | Moderate/severe BPD | 13 | -0.082      | -0.340      | 0.176       | 0.533 | 0.0                    |
|                                    | Any sepsis          | 8  | -0.050      | -0.280      | 0.179       | 0.670 | 0.0                    |
| Male sex (log OR)                  | Mortality           | 11 | -0.159      | -1.396      | 1.078       | 0.801 | 0.0                    |
|                                    | Moderate/severe BPD | 11 | -0.597      | -1.400      | 0.206       | 0.145 | 0.22                   |
|                                    | Any sepsis          | 9  | -0.530      | -1.748      | 0.689       | 0.394 | 0.00                   |
| Antenatal corticosteroids (log OR) | Mortality           | 10 | 0.640       | -0.647      | 1.928       | 0.330 | 0.0                    |
|                                    | Moderate/severe BPD | 11 | 0.133       | -0.792      | 1.057       | 0.779 | 0.0                    |
|                                    | Any sepsis          | 9  | 0.380       | -0.357      | 1.116       | 0.312 | 0.22                   |

BPD: bronchopulmonary dysplasia, K: number of studies; R<sup>2</sup>-analog: total between-study variance explained by the moderator.

## References

- Andersen, C.; Kent, A.; Schmidt, B.; Nahmias, C.; deSa, D.; Bourgeois, J.; et al. Pulmonary fluorodeoxyglucose uptake in infants of very low birth weight with and without intrauterine inflammation. *J. Pediatr.* **2003**, *143*, 470-476; DOI: 10.1067/s0022-3476(03)00408-6.
- Babnik, J.; Stucin-Gantar, I.; Kornhauser-Cerar, L.; Sinkovec, J.; Wraber, B.; Derganc, M. Intrauterine inflammation and the onset of peri-intraventricular hemorrhage in premature infants. *Biol. Neonate.* **2006**, *90*, 113-121; DOI: 10.1159/000092070.
- Been, J.V.; Rours, I.G.; Kornelisse, R.F.; De Krijger, R.R.; Kramer, B.W.; Zimmermann, L.J. Chorioamnionitis alters the response to surfactant in preterm infants. *Neonatology.* **2009**, *95*, 375-376; DOI: 10.1016/j.jpeds.2009.07.044.
- Dessardo, N.S.; Mustac, E.; Dessardo, S.; Banac, S.; Peter, B.; Finderle, A.; et al. Chorioamnionitis and chronic lung disease of prematurity: A path analysis of causality. *Am. J. Perinatol.* **2012**, *29*, 133-140; DOI: 10.1055/s-0031-1295654.
- Fujimura, M.; Takeuchi, T.; Kitajima, H.; Nakayama, M. Chorioamnionitis and serum IgM in Wilson-Mikity syndrome. *Arch. Dis. Child.* **1989**, *64*, 1379-1383; DOI: 10.1136/adc.64.10\_Spec\_No.1379.
- Graham, E.M.; Holcroft, C.J.; Rai, K.K.; Donohue, P.K.; Allen, M.C. Neonatal cerebral white matter injury in preterm infants is associated with culture positive infections and only rarely with metabolic acidosis. *Am. J. Obstet. Gynecol.* **2004**, *191*, 1305-10; DOI: 10.1016/j.ajog.2004.06.058.
- Hong, S.; Jeong, M.; Oh, S.; Oh, J.W.; Park, C.W.; Park, J.S.; et al. Funisitis as a Risk Factor for Adverse Neonatal Outcomes in Twin Neonates with Spontaneous Preterm Birth: A Retrospective Cohort Study. *Yonsei Med. J.* **2021**, *62*, 822-828; DOI: 10.3349/ymj.2021.62.9.822.
- Ikeda, S.; Kihira, K.; Yokoi, A.; Tamakoshi, K.; Miyazaki, K.; Furuhashi, M. The levels of the neutrophil elastase in the amniotic fluid of pregnant women whose infants develop bronchopulmonary dysplasia. *J. Matern. Fetal Neonatal Med.* **2015**, *28*, 479-483; DOI: 10.3109/14767058.2014.921674.
- Jackson, C.M.; Wells, C.B.; Tabangin, M.E.; Meinen-Derr, J.; Jobe, A.H.; Choungnet, C.A. Pro-inflammatory immune responses in leukocytes of premature infants exposed to maternal chorioamnionitis or funisitis. *Pediatr. Res.* **2017**, *81*, 384-390; DOI: 10.1038/pr.2016.232.
- Kelly, M.; Vignes, K.; Cockerham, C.; Su, L.; Stromberg, A.J.; Huang, H.; et al. Cord blood CRP: preferred biomarker to histologic chorioamnionitis for neonatal outcomes in early preterm infants. *Am. J. Obstet. Gynecol.* **2022**, *226*, S94; DOI:10.1016/j.ajog.2021.11.172.
- Kent, A.; Dahlstrom, J.E. Chorioamnionitis/funisitis and the development of bronchopulmonary dysplasia. *J. Paediatr. Child Health.* **2004**, *40*, 356-359; DOI: 10.1111/j.1440-1754.2004.00366.x.
- Kent, A.; Lomas, F.; Hurron, E.; Dahlstrom, J.E. Antenatal steroids may reduce adverse neurological outcome following chorioamnionitis: neurodevelopmental outcome and chorioamnionitis in premature infants. *J. Paediatr. Child Health.* **2005**, *41*, 186-190; DOI: 10.1111/j.1440-1754.2005.00585.x.

13. Lahra, M.M.; Beeby, P.J.; Jeffery, H.E. Intrauterine inflammation, neonatal sepsis, and chronic lung disease: a 13-year hospital cohort study. *Pediatrics*. **2009**, *123*, 1314-1319; DOI: 10.1542/peds.2008-0656.
4. Lau, J.; Magee, F.; Qiu, Z.; Houbé, J.; Von Dadelszen, P.; Lee, S.K. Chorioamnionitis with a fetal inflammatory response is associated with higher neonatal Mortality, morbidity, and resource use than chorioamnionitis displaying a maternal inflammatory response only. *Am. J. Obstet. Gynecol.* **2005**, *193*, 708-713; DOI: 10.1016/j.ajog.2005.01.017.
15. Lee, J.Y.; Park, K.H.; Kim, A.; Yang, H.R.; Jung, E.Y.; Cho, S.H. Maternal and Placental Risk Factors for Developing Necrotizing Enterocolitis in Very Preterm Infants. *Pediatr. Neonatol.* **2017**, *58*, 57-62; DOI: 10.1016/j.pedneo.2016.01.005.
16. Lee, Y.; Kim, H.J.; Choi, S.J.; Oh, S.Y.; Kim, J.S.; Roh, C.R.; et al. Is there a stepwise increase in neonatal morbidities according to histological stage (or grade) of acute chorioamnionitis and funisitis?: effect of gestational age at delivery. *J. Perinat. Med.* **2015**, *43*, 259-267; DOI: 10.1515/jpm-2014-0035.
17. Liu, Z.; Tang, Z.; Li, J.; Yang, Y. Effects of placental inflammation on neonatal outcome in preterm infants. *Pediatr. Neonatol.* **2014**, *55*, 35-40; DOI: 10.1016/j.pedneo.2013.05.007.
18. Lynch, A.M.; Berning, A.A.; Thevarajah, T.S.; Wagner, B.D.; Post, M.D.; McCourt, E.A.; et al. The role of the maternal and fetal inflammatory response in retinopathy of prematurity. *Am. J. Reprod. Immunol.* **2018**, *80*, e12986; DOI: 10.1111/aji.12986.
9. Pavcnik-Arnol, M.; Lucovnik, M.; Kornhauser-Cerar, L.; Premru-Srsen, T.; Hojker, S.; Derganc, M. Lipopolysaccharide-binding protein as marker of fetal inflammatory response syndrome after preterm premature rupture of membranes. *Neonatology*. **2014**, *105*, 121-127; DOI: 10.1159/000356735.
20. Perniciaro, S.; Casarin, J.; Nosetti, L.; Binda, C.; Salvatore, S.; Ghezzi, F.; et al. Early- and Late-Respiratory Outcome in Very Low Birth Weight with or without Intrauterine Inflammation. *Am. J. Perinatol.* **2020**, *37*, S76-S83; DOI: 10.1055/s-0040-1714257.
21. Plakkal, N.; Soraisham, A.S.; Trevenen, C.; Freiheit, E.A.; Sauve, R. Histological chorioamnionitis and bronchopulmonary dysplasia: a retrospective cohort study. *J. Perinatol.* **2013**, *33*, 441-445; DOI: 10.1038/jp.2012.154.
22. Puri, K.; Taft, D.H.; Ambalavanan, N.; Schibler, K.R.; Morrow, A.L.; Kallapur, S.G. Association of Chorioamnionitis with Aberrant Neonatal Gut Colonization and Adverse Clinical Outcomes. *PLoS One*. **2016**, *11*, e0162734; DOI: 10.1371/journal.pone.0162734.
23. Richardson, B.S.; Wakim, E.; daSilva, O.; Walton, J. Preterm histologic chorioamnionitis: impact on cord gas and pH values and neonatal outcome. *Am. J. Obstet. Gynecol.* **2006**, *195*, 1357-65; DOI: 10.1016/j.ajog.2006.03.053.
24. Rocha, G.; Proenca, E.; Quintas, C.; Rodrigues, T.; Guimaries, H. Chorioamnionitis and brain damage in the preterm newborn. *J. Matern. Fetal Neonatal Med.* **2007**, *20*, 745-749; DOI: 10.1080/14767050701580515.
25. Salas, A.A.; Faye-Petersen, O.M.; Sims, B.; Peralta-Carcelen, M.; Reilly, S.D.; McGwin, G.Jr.; et al. Histological characteristics of the fetal inflammatory response associated with neurodevelopmental impairment and death in extremely preterm infants. *J. Pediatr.* **2013**, *163*, 652-7.e1-2; DOI: 10.1016/j.jpeds.2013.03.081.
26. Smit, A.L.; Been, J.V.; Zimmermann, L.J.; Kornelisse, R.F.; Andriessen, P.; Vanterpool, S.F.; et al. Automated auditory brainstem response in preterm newborns with histological chorioamnionitis. *J. Matern. Fetal Neonatal Med.* **2015**, *28*, 1864-1869; DOI: 10.3109/14767058.2014.971747.
27. Thomas, W.; Seidenspinner, S.; Kawczyńska-Leda, N.; Wirbelauer, J.; Szymankiewicz, M.; Speer, C.P. Soluble receptor for advanced glycation end products (sRAGE) in tracheobronchial aspirate fluid and cord blood of very low birth weight infants with chorioamnionitis and funisitis. *Early Hum. Dev.* **2010**, *86*, 593-598; DOI: 10.1016/j.earlhumdev.2010.07.013.
28. Thorell, A.; Hallingstrom, M.; Hagberg, H.; Fyhr, I.M.; Tsiartas, P.; Olsson, I.; et al. Microbial invasion of the amniotic cavity is associated with impaired cognitive and motor function at school age in preterm children. *Pediatr. Res.* **2020**, *87*, 924-931; DOI: 10.1038/s41390-019-0666-3.
29. Torchin, H.; Lorthe, E.; Goffinet, F.; Kayem, G.; Subtil, D.; Truffert, P.; et al. Histologic Chorioamnionitis and Bronchopulmonary Dysplasia in Preterm Infants: The Epidemiologic Study on Low Gestational Ages 2 Cohort. *J. Pediatr.* **2017**, *187*, 98-104.e3; DOI: 10.1016/j.jpeds.2017.05.019.
30. Trevisanuto, D.; Peruzzetto, C.; Cavallin, F.; Vedovato, S.; Cosmi, E.; Visentin, S.; et al. Fetal placental inflammation is associated with poor neonatal growth of preterm infants: a case-control study. *J. Matern. Fetal Neonatal Med.* **2013**, *26*, 1484-1490; DOI: 10.3109/14767058.2013.789849.
31. Wharton, K.N.; Pinar, H.; Stonestreet, B.S.; Tucker, R.; McLean, K.R.; Wallach, M.; et al. Severe umbilical cord inflammation-a predictor of periventricular leukomalacia in very low birth weight infants. *Early Hum. Dev.* **2004**, *77*, 77-87; DOI: 10.1016/j.earlhumdev.2004.02.001.
32. Woo, S.J.; Jung, H.J.; Kim, S.N.; Choe, G.; Ahn, J.; Park, K.H. Effects of maternal and placental inflammation on retinopathy of prematurity. *Graefes Arch. Clin. Exp.* **2012**, *250*, 915-923; DOI: 10.1007/s00417-011-1648-2.

33. Yamada N, Sato Y, Moriguchi-Goto S, Yamashita A, Kodama Y, Sameshima H, et al. Histological severity of fetal inflammation is useful in predicting neonatal outcome. *Placenta*. 2015;36(12):1490-3. <https://doi.org/10.1016/j.placenta.2015.10.021>
